# Supplementary material for: Floating Ag-NPs@Cu-NW bundles fabricated on copper mesh for highly sensitive SERS detection of uric acid in pretreatment-free urine
Source: Royal Society of Chemistry journal article supplement (doi:10.1039/d2an01586b), 2022-01-01
Supplement: d2an01586b1.pdf [file d2an01586b1.pdf]

*Supporting information*

**Floating Ag-NPs@Cu-NWs bundles fabricated on cooper mesh for highly sensitive SERS detection of uric acid in Pretreatment-free urine**

**Ziyan Song<sup>a,b</sup>, Siyu Chen<sup>c</sup>, Qiushi He<sup>a,b</sup>, Hu Liang<sup>a,b</sup>, Guangyao Huang<sup>c</sup>, Pan Li<sup>c,d\*</sup>, Zongyao Hao<sup>a,b\*</sup>, Liangbao Yang<sup>c,d</sup>**

<sup>a</sup> Department of Urology, The First Affiliated Hospital of Anhui Medical University, Hefei, China.

<sup>b</sup> Institute of Urology & Anhui Province Key Laboratory of Genitourinary Diseases, Anhui Medical University, 218th Jixi Road, Hefei, Anhui 230022, China.

<sup>c</sup> Institute of Health and Medical Technology, Hefei Institutes of Physical Science, Chinese Academy of Sciences, Hefei, Anhui 230031, China.

<sup>d</sup> Department of Pharmacy, Hefei Cancer Hospital, Chinese Academy of Sciences, Hefei 230031, Anhui, China.

\* Correspondence should be addressed to Zongyao Hao and Pan Li

E-mail: haozongyao@163.com

Fax: (+86) 551-62922234

Tel: (+86) 551-62922234

E-mail: lipan2011@iim.ac.cn

Fax: (+86) 551-65592420

Tel: (+86) 551-65592385

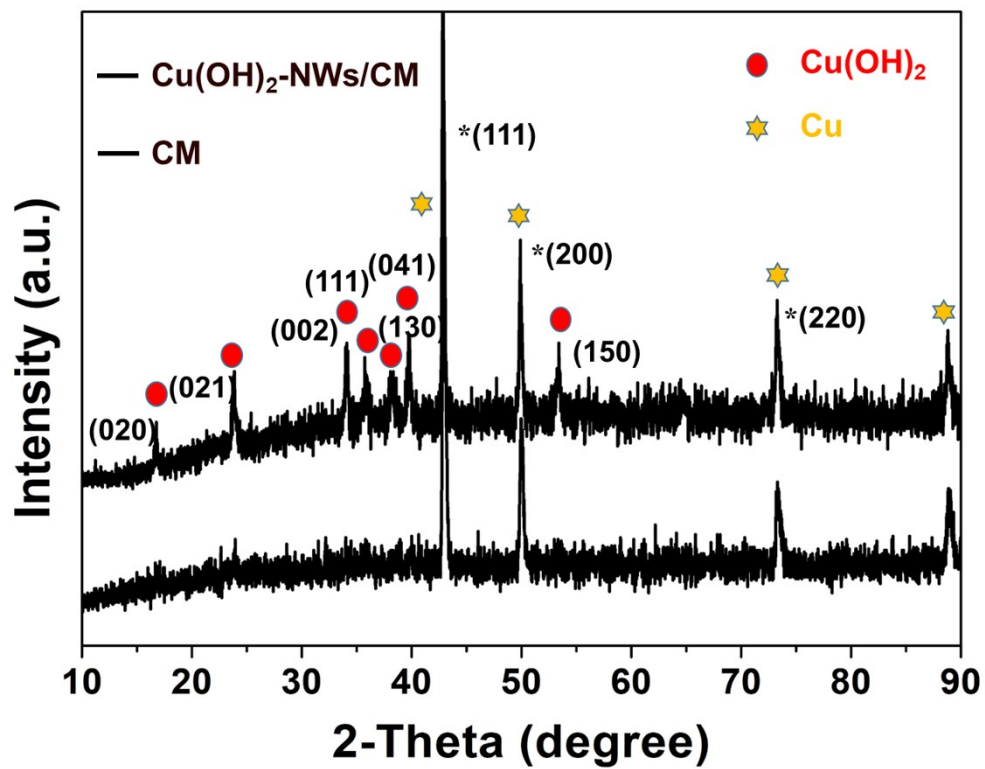

**Fig. S1** XRD patterns of CM and  $\text{Cu(OH)}_2\text{-NWs/CM}$  substrate. The peaks marked with asterisks are from the CM, while the other peaks correspond to orthorhombic  $\text{Cu(OH)}_2$  nanocrystals.

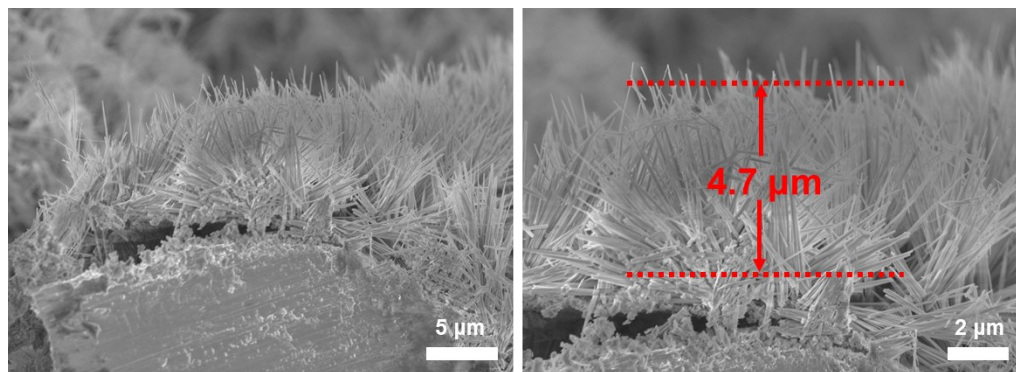

**Fig. S2** Cross-section SEM images of the  $\text{Cu(OH)}_2\text{-NWs}$  on CM.

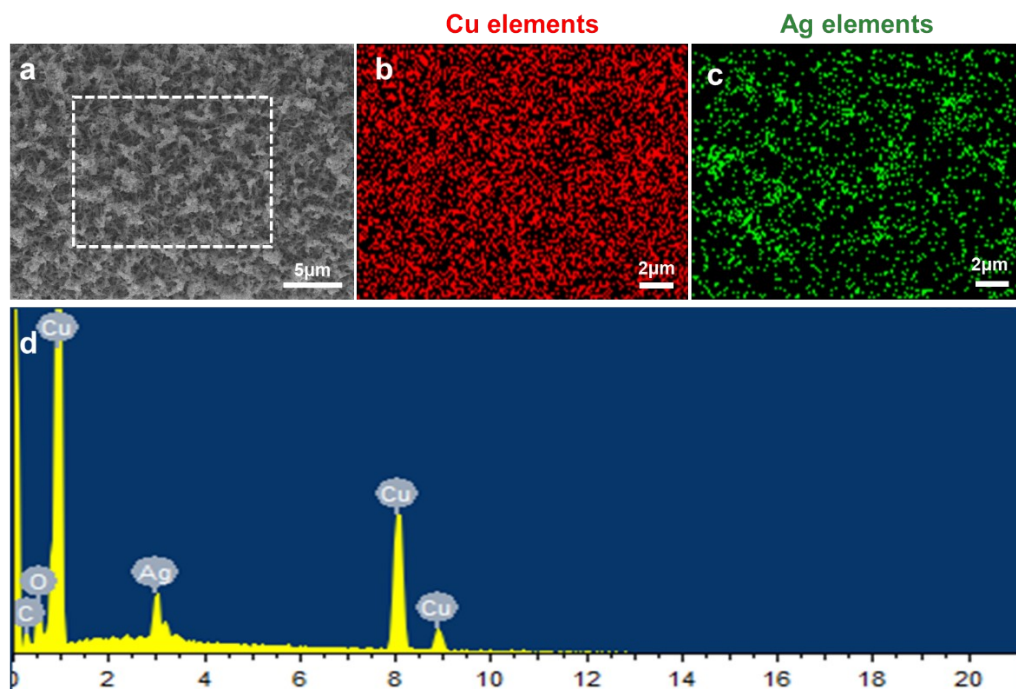

**Fig. S3** SEM images of the Ag-NPs@Cu-NWs bundles/CM substrate and the corresponding elemental mappings of Cu, Ag.

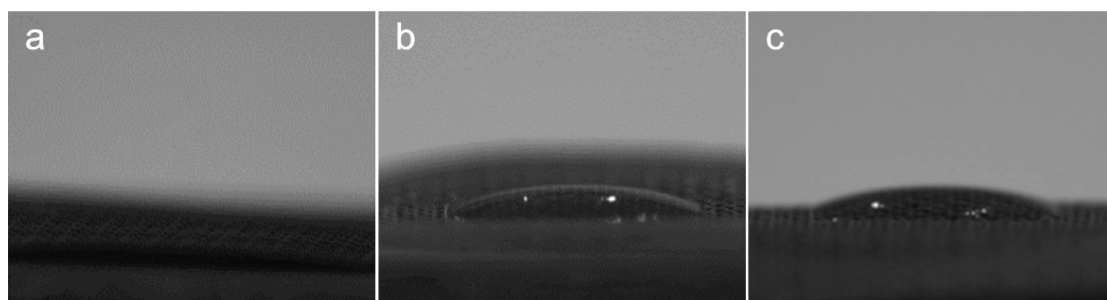

**Fig. S4** Photograph of different CA between different solutions and substrates. (a) CTAB solution, (b) 2-Propanol, (c) DI water.

|               | $r_{1a}/Mn$<br>$m^{-1}$ at 25°C | $\theta_0/^\circ$ | $\cos^2 \theta_0$ | $r_{1a} \cos^2 \theta_0$ |
|---------------|---------------------------------|-------------------|-------------------|--------------------------|
| CTAB solution | 38                              | $\sim 0$          | 1                 | 38                       |
| 2-Propanol    | 21                              | 33.1              | 0.70              | 15                       |
| DI water      | 73                              | 31.2              | 0.73              | 53                       |

**Table S1** Surface tension ( $r_{1a}$ ), and apparent contact angle ( $\theta_0$ ) values for  $Cu(OH)_2$ -NWs arrays on CM dried in CTAB solution, 2-Propanol and DI water.

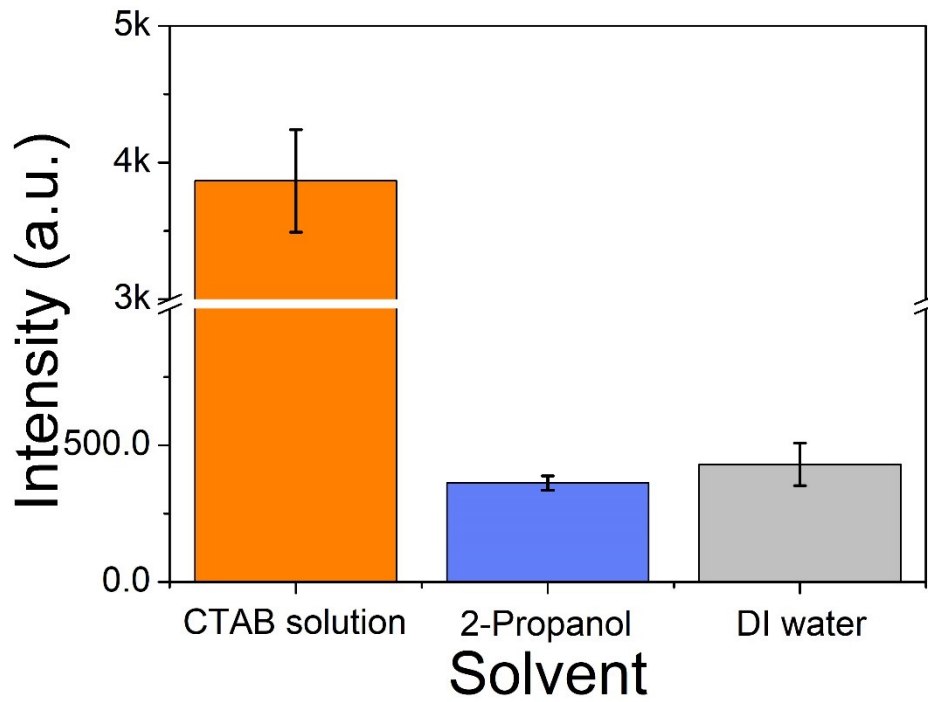

**Fig. S5** Comparison of substrate detection effects (1 nM CV, Raman peak at  $1617\text{ cm}^{-1}$ ) induced by CTAB solution, 2-Propanol and DI water.

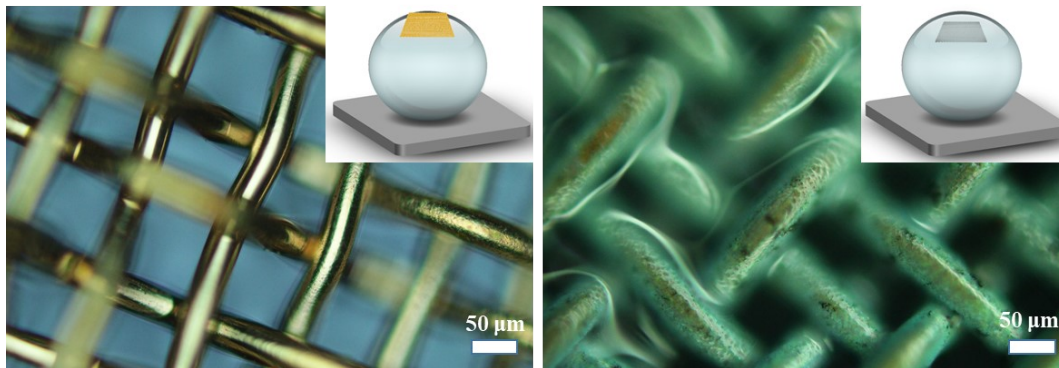

**Fig. S6** Photograph of bare copper mesh and Ag-NPs@Cu-NWs bundles/CM substrate floating on water under light microscope, the illustration represents the different wetting states of the surfaces.

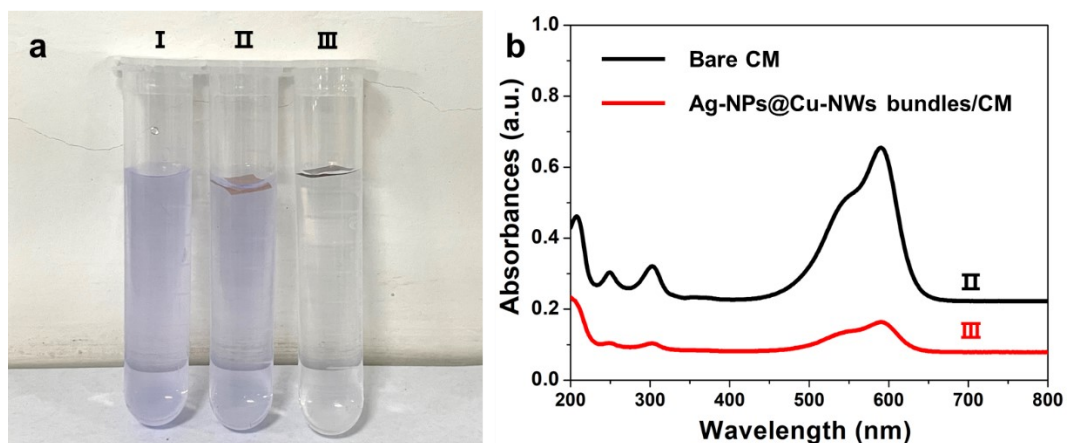

**Fig. S7** Typical pictures (a) of CM (II) and substrate (III) after immersing in the identical concentration of 10  $\mu\text{M}$  CV (I) for 2 h. It reveals that the CV molecules were easily absorbed by a piece of prepared SERS substrate.

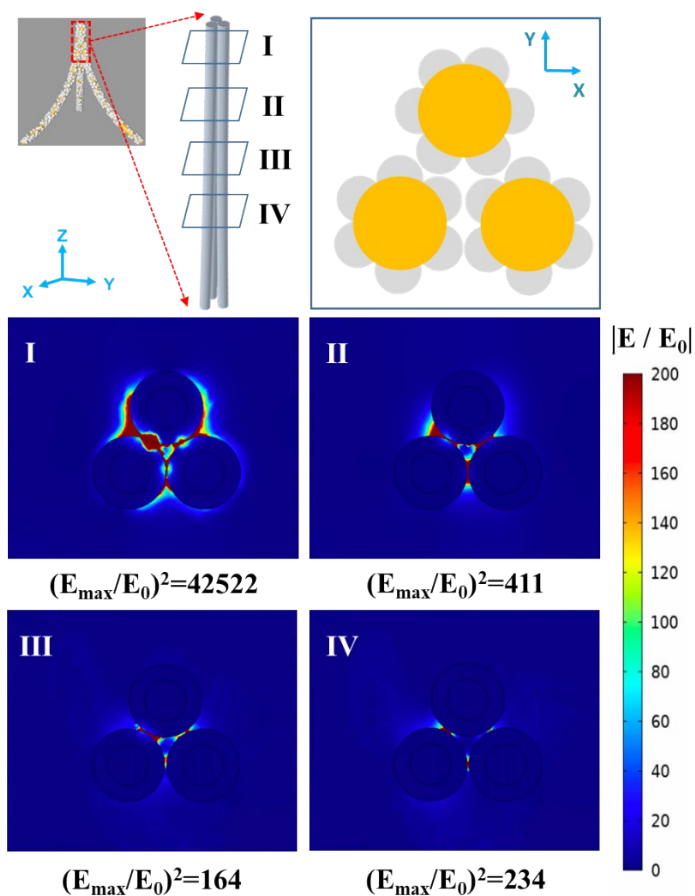

**Fig. S8** In the FDTD simulation, the Ag-NPs@Cu-NWs bundles model used to simulate the electric field distribution at 4 different locations.

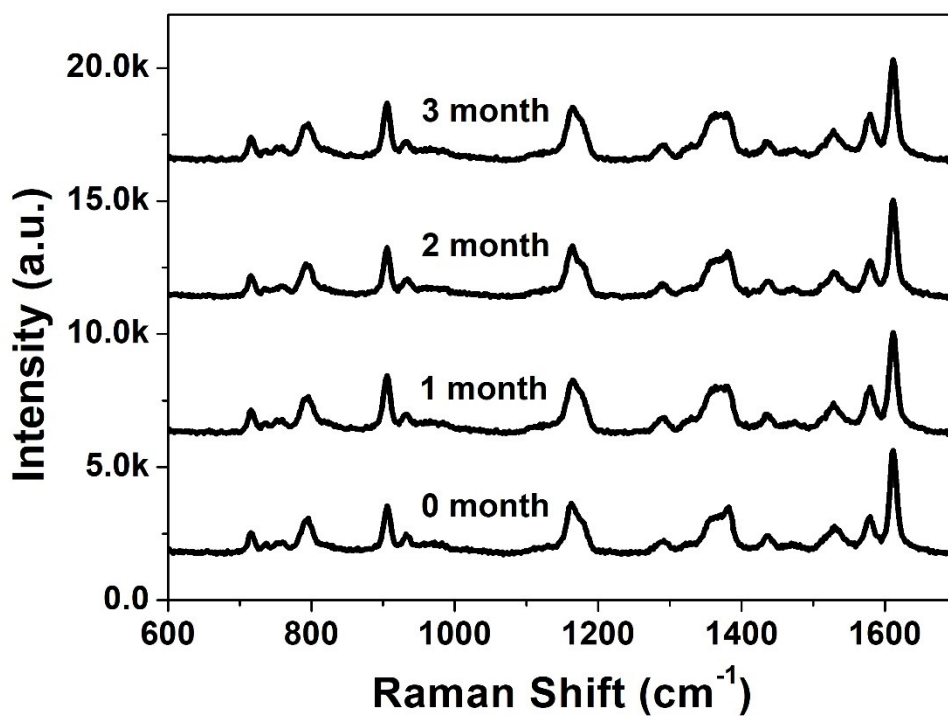

**Fig. S9** Stability characterization: the SERS detection performance (1 nM, CV) of the substrate remained basically unchanged after one month, two months and three months.

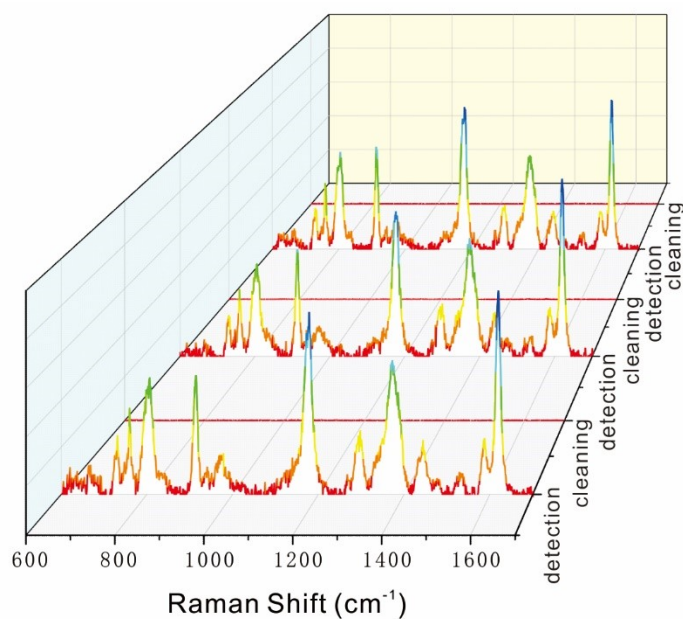

**Fig. S10** SERS spectra of 10 nM CV after three cycles.

| Raman Shift (cm <sup>-1</sup> ) | SERS peak (cm <sup>-1</sup> ) | Tentative band assignment |
|---------------------------------|-------------------------------|---------------------------|
| 380                             |                               |                           |
|                                 | 508 (vwsh)                    | C-N-C ring vibration      |

|           |             |                                        |
|-----------|-------------|----------------------------------------|
|           | 534 (vw)    |                                        |
| 626 (w)   | 640 (S)     | Skeletal ring vibration                |
| 705 (w)   | 730 (w)     | N-H bending                            |
| 783 (m)   | 812 (m)     | Ring vibration                         |
| 884 (w)   | 889 (m)     | N-H bending                            |
| 998 (s)   | 1017 (w)    | Ring vibration                         |
| 1033 (vs) |             |                                        |
| 1122 (s)  | 1134 (vs)   | C-N                                    |
| 1233 (s)  | 1206 (m)    | N-C-C stretching and bending           |
| 1289 (s)  | 1266 (w)    |                                        |
| 1355 (w)  | 1369 (s)    | C-O                                    |
|           | 1515 (vwsh) | Asymmetric deformation NH <sub>3</sub> |
| 1406 (vs) |             |                                        |
| 1499 (s)  |             |                                        |
| 1596 (m)  | 1554 (m)    | C-N                                    |
| 1679 (vs) | 1684 (s)    |                                        |

**Table S2** Band assignments for normal Raman (solid) and tentative SERS band assignments for uric acid.

| Component            | SERS intensity at 640cm <sup>-1</sup> (counts) | Recovery (%) |
|----------------------|------------------------------------------------|--------------|
| None                 | 2293(±172)                                     |              |
| Urea                 | 2132(±145)                                     | 93.0%        |
| Ascorbic acid        | 2037(±103)                                     | 88.4%        |
| Urea + Ascorbic acid | 2183(±211)                                     | 95.2%        |

**Table S3** The SERS intensities and corresponding recoveries of different component solutions, the concentration of each substance is 10 μM.
